# Supplementary material
Source: PubMed Central journal article supplement (PMC4587706)
Supplement: ASN.2015020117_ASN2015020117SupplementaryData.pdf [file ASN.2015020117_ASN2015020117SupplementaryData.pdf]

## **Appendix for Rationale and Approaches to Reduce Phosphate and FGF23 Levels in CKD**

Tamara Isakova, MD, MMSc,<sup>1</sup> Joachim H. Ix, MD, MAS,<sup>2</sup> Stuart M. Sprague, DO,<sup>3</sup> Kalani L. Raphael, MD, MS,<sup>4</sup> Linda Fried, MD, MPH,<sup>5</sup> Jennifer J. Gassman, PhD,<sup>6</sup> Dominic Raj, MD,<sup>7</sup> Alfred K. Cheung, MD,<sup>4</sup> John W. Kusek, PhD,<sup>8</sup> Michael F. Flessner, MD, PhD,<sup>8</sup> Myles Wolf, MD, MMSc,<sup>1</sup> and Geoffrey A. Block, MD.<sup>9</sup>

From

<sup>1</sup>Division of Nephrology and Hypertension, Department of Medicine and Center for Translational Metabolism and Health, Institute for Public Health and Medicine, Northwestern University Feinberg School of Medicine, Chicago, IL

<sup>2</sup>Nephrology Section, Veterans Affairs San Diego Healthcare System and Division of Nephrology and Preventive Medicine, University of California, San Diego, San Diego, CA

<sup>3</sup>NorthShore University Health System-University of Chicago, Pritzker School of Medicine, Evanston, IL

<sup>4</sup>Salt Lake City Veterans Affairs Healthcare System and Division of Nephrology and Hypertension, University of Utah, Salt Lake City, UT

<sup>5</sup>Renal Section, VA Pittsburgh Healthcare System, University of Pittsburgh School of Medicine, Pittsburgh, PA

<sup>6</sup>Department of Biostatistics and Epidemiology, Cleveland Clinic Foundation, Cleveland, OH

<sup>7</sup>Division of Renal Diseases and Hypertension, the George Washington University, Washington DC

<sup>8</sup>National Institute of Diabetes and Digestive and Kidney Diseases, Bethesda, MD

<sup>9</sup>Denver Nephrology, Denver, CO

Correspondence should be addressed to:

Tamara Isakova, MD, MMSc 633 N. St. Clair St., Suite 18-083, Chicago, IL 60611;

Phone: (312) 503-6921

Fax: (312) 503-5656

Email: [tamara.isakova@northwestern.edu](mailto:tamara.isakova@northwestern.edu)

## **The CKD Optimal Management with BInders and Nicotinamide (COMBINE) Study**

### **Group**

U01 Consortium Steering Committee Chair: Linda Fried, MD, MPH; U01 Consortium Principal Investigators: Jennifer J. Gassman, PhD; Dominic Raj, MD; Myles Wolf, MD, MMSc; Joachim Ix, MD, MAS; and Alfred K. Cheung, MD; U01 Consortium Co-Principal Investigators: Tamara Isakova, MD, MMSc; Geoff Block, MD and Kalani L. Raphael, MD, MS; NIDDK Project Officers: Michael F. Flessner, MD, PhD and John W. Kusek, PhD.

Data Coordinating Center: Department of Quantitative Health Sciences, Cleveland Clinic Foundation, Cleveland, OH, (Principal Investigator) Jennifer J. Gassman, PhD.

Participating Clinical Centers: George Washington University, Washington, DC, (Principal Investigator) Dominic Raj, MD; Northwestern University Feinberg School of Medicine, Chicago, IL, (Principal Investigator) Myles Wolf, MD, MMSc; NorthShore University Health System Evanston Hospital, Evanston, IL, (Principal Investigator) Stuart Sprague, DO; University of California San Diego, VA San Diego Healthcare System, San Diego, CA, (Principal Investigator) Joachim Ix, MD, MAS; Denver Nephrology, Denver, CO, (Principal Investigator) Geoffrey Block, MD; University of Utah and Salt Lake City VA Health Care System, Salt Lake City, UT, (Principal Investigator) Kalani L. Raphael, MD, MS.

Additional MRI Sites: University of Colorado, Denver, CO, (Principal Investigator) Michel Chonchol, MD; National Institutes of Health Clinical Center, Bethesda, MD, (Principal Investigator) Ahmed M. Gharib, MB, ChB.

Cardiac MRI Core: 4D Lab – Advanced Image Data Analysis, Department of Radiology, Northwestern University Feinberg School of Medicine, Chicago, IL, (Principal Investigator) James C. Carr, MD.

Renal MRI Core: Center for Advanced Imaging, Department of Radiology, Evanston

Northwestern Healthcare, Evanston, IL, (Principal Investigator) Pottumarthi V. Prasad, PhD.

Central FGF23 and Biomarker Laboratory: Department of Laboratory Medicine, University of Washington, Seattle, WA, (Principal Investigator) Andrew N. Hoofnagle, MD, PhD.

Central Chemistry Laboratory: Spectra Clinical Research, Rockleigh, NJ.

Central Drug Distribution Center: Fisher Clinical Services, Mount Prospect, IL.

National Institute of Diabetes and Digestive and Kidney Diseases (NIDDK) Project Office:

Michael F. Flessner, MD, PhD; John W. Kusek, PhD.
